1 **Article title: Ethical review of clinical research with generative**  
2 **AI: Evaluating ChatGPT's accuracy and reproducibility**

3

4 **Short title: Evaluating ChatGPT's accuracy and reproducibility**

5

6 **Authors:**

7 Yasuko Fukataki<sup>1, 2</sup>, Hayashi Wakako<sup>1</sup>, Nishimoto Naoki<sup>3</sup>, Yoichi M. Ito<sup>1, 3</sup>

8

9 **Affiliations:**

10 <sup>1</sup>Health Data Science, Department of Social Science, Graduate School of Medicine, Hokkaido  
11 University, Sapporo, Japan

12 <sup>2</sup>Biostatistics and Data Management, Sapporo Medical University, Sapporo, Japan

13 <sup>3</sup>Data Science Center, Promotion Unit, Institute of Health Science Innovation for Medical Care,  
14 Hokkaido University Hospital, Sapporo, Japan

15

16 **Corresponding author:**

17 Yasuko Fukataki

18 E-mail: [yafukataki@sapmed.ac.jp](mailto:yafukataki@sapmed.ac.jp)

19 **Abstract**

NOTE: This preprint reports new research that has not been certified by peer review and should not be used to guide clinical practice.

20 This study evaluated the accuracy and reproducibility of ChatGPT models, specifically GPT-4 and  
21 GPT-4o, by reviewing Japanese-language clinical research protocols and informed consent forms using  
22 Japanese prompts. The integration of generative AI technologies into clinical research ethics reviews  
23 has the potential to enhance consistency, reduce human error, and decrease the manual effort required  
24 to assess complex documents. This study primarily aimed to assess and compare the ability of these  
25 models to accurately extract and summarize key elements such as research objectives, study design,  
26 and ethical considerations, which are critical for ethical review processes. We developed and optimized  
27 custom prompts to improve the performance of the models, focusing on the essential aspects of the  
28 protocol and informed consent review. The results showed that GPT-4o achieved an 80% accuracy rate  
29 in identifying research objectives and a 100% accuracy rate for research design, indicating superior  
30 consistency compared with GPT-4, which, despite being slightly less accurate, still showed significant  
31 potential for application in ethics reviews. Furthermore, a comparison between customized GPTs and  
32 standard prompts revealed that customized GPTs provided significantly higher reproducibility and  
33 accuracy, underscoring the value of fine-tuning and Retrieval-Augmented Generation techniques for  
34 enhancing AI-assisted review processes. Additionally, challenges in parsing complex PDF documents  
35 were identified, highlighting the importance of standardized document formatting to ensure accurate  
36 AI analysis. These findings demonstrate the potential of AI-driven systems to improve the efficiency,  
37 accuracy, and standardization of research ethics evaluations, potentially setting new standards for AI  
38 integration in clinical research practice.

39

## 40 **Author summary**

41 This study examined the use of ChatGPT models, specifically GPT-4 and GPT-4o, to review clinical  
42 research protocols and informed consent forms written in Japanese, focusing on their ability to improve  
43 the review process in clinical research ethics. Our objective was to determine whether these AI models  
44 can reliably extract and summarize critical elements, such as research objectives, study design, and  
45 ethical considerations, from research documents. The GPT-4o model demonstrated high accuracy and  
46 reproducibility, particularly in evaluating research designs, with 80% and 100% accuracy rates for  
47 research objectives and research designs, respectively. GPT-4 also exhibited good performance, albeit  
48 with a slightly lower accuracy. The findings revealed that tailored prompts significantly enhanced  
49 model performance compared to standard prompts, highlighting the necessity for precise  
50 customization in AI-driven analyses. Furthermore, we discovered that well-structured documents are  
51 crucial for enabling accurate AI-assisted reviews. These results suggest that, with further refinement,  
52 ChatGPT could become a valuable tool for enhancing the consistency and efficiency of ethics  
53 committee evaluations, potentially reducing manual workload and setting new standards for AI  
54 integration in clinical research.

55

## 56 **Introduction**

57 An ethical review of clinical research is essential to ensure patient safety and reliability. Ethical review

58 committees evaluate the ethical appropriateness of research protocols and establish standards to protect  
59 patient rights and safety. However, the review processes of Institutional Review Boards (IRBs)  
60 globally and Certified Review Boards (CRBs) in Japan face several challenges [1-10]. For example,  
61 CRBs in Japan exhibit variability in the details and quality of review comments, necessitating the  
62 standardization and equalization of review quality [1-7]. Internationally, discrepancies in revision  
63 instructions for research protocols and consent documents, as well as inconsistencies in review times,  
64 have been reported [8-10]. This variability in review quality undermines the consistency and  
65 transparency of the review process. These issues often stem from differences in the interpretation of  
66 review standards and shortage of human resources among experts. Delays in the review process risk  
67 delaying the start of research, which, in turn, delays the introduction of new treatments and medical  
68 technologies. Moreover, inadequate or inappropriate revision comments based on ethical standards  
69 may compromise participant safety due to insufficient or improper modifications of protocols and  
70 informed consent forms (ICFs).

71

72 In recent years, advancements in Large Language Models (LLMs), machine learning, deep learning,  
73 and generative artificial intelligence (AI) have shown promise in medical fields, including medical  
74 image analysis, electronic health record analysis, and virtual health assistants [11-17]. LLMs, which  
75 are models based on deep learning, are a part of generative AI and are capable of performing natural  
76 language processing (NLP) tasks [18]. ChatGPT, a representative example of generative AI, has

77 demonstrated its ability to learn from large datasets and execute complex language tasks [19]. For  
78 instance, ChatGPT's abilities have been widely recognized, achieving results comparable to passing  
79 medical licensing exams in both Japan and the United States [20-22].

80

81 We believe that the advancement of these technologies presents potential improvements in the quality  
82 and efficiency of IRB reviews of research protocols. However, to our knowledge, no prior research has  
83 explored the application of generative AI to the IRB review process. One major reason is the high  
84 confidentiality of research documents, such as protocols, , making it inappropriate for cloud-based  
85 generative AI (e.g., ChatGPT, Gemini, Copilot) to analyze these documents. Furthermore, IRB reviews  
86 typically require the perspectives of multiple experts, extensive knowledge and experience, and are  
87 complex processes [1,23-25]. It remains unclear whether generative AI can fully replicate this process.  
88 Additionally, evaluating AI's ability to ensure the reproducibility and accuracy of reviews is crucial,  
89 but this has not been sufficiently validated.

90

91 By developing LLMs that operate in local environments, it becomes possible to safely process highly  
92 confidential documents, thereby mitigating the risk of data leakage associated with cloud-based  
93 generative AI. However, the development of LLMs in a local environment requires advanced technical  
94 expertise, such as model training, optimization, and securing computational resources, which are  
95 expected to demand significant time and effort.

96

97 Therefore, this study aimed to evaluate how current cloud-based generative AI technologies can  
98 contribute to the ethical review process by focusing on the accuracy and reproducibility of ChatGPT  
99 in analyzing and summarizing medical documents. Specifically, we developed four custom GPT  
100 models and assessed their ability to accurately read and summarize highly specialized, complex  
101 Japanese research protocols and informed consent documents. Additionally, we compared the latest  
102 GPT-4o model (as of May 13, 2024) with the conventional GPT-4 model to evaluate improvements in  
103 processing accuracy when handling Japanese documents. This preliminary study aimed to determine  
104 whether GPT models can produce accurate and reproducible outputs based on professional review  
105 standards for IRB reviews. This essential data will be used for more extensive testing and validation  
106 in upcoming trials. The initial evaluation results indicate that ChatGPT can accurately interpret  
107 specialized research protocols and ICFs, faithfully extracting and summarizing the specified content.  
108 These findings suggest that generative AI technology has potential utility in analyzing medical  
109 documents.

110

111 Future studies will explore the use of Retrieval-Augmented Generation (RAG) technology to assess  
112 whether AI can appropriately perform reviews from multiple expert perspectives. If cloud-based  
113 generative AI proves effective for IRB reviews, its implementation through secure, contracted cloud  
114 services may be considered, offering scalability and maintainability with faster deployment than local

115 LLM development. Additionally, based on this study's results, local LLM development can be  
116 considered, which could further enhance confidentiality and allow for customization to specific  
117 requirements.

118

119 In future, generative AI and LLM technologies are expected to rapidly extract and summarize  
120 information from research protocols and ICFs, generate comments consistent with review standards,  
121 and produce comprehensive review feedback. This would enable AI to play a complementary role in  
122 supporting the multidimensional reviews conducted by experts.

123 Furthermore, this study and future research may provide new solutions to address the current  
124 challenges in ethical reviews, leading to the development of AI-assisted review support tools that  
125 streamline the review process and enhance patient safety and research reliability. Importantly, the goal  
126 of this research is to clarify the supportive role that generative AI can play in the ethical review process,  
127 aiming to complement, rather than replace, expert reviews. The primary focus of this research was to  
128 explore the range and limitations of AI's role in supporting reviews and to identify efficient and  
129 appropriate methods for utilizing generative AI.

130

## 131 **Results**

132 In this study, we evaluated research protocols and informed consent documents using customized GPTs,  
133 focusing on research objectives and background, research design, and advantages and disadvantages.

134 We compared the accuracy and reproducibility of the GPT-4 and GPT-4o models, as well as the  
135 reproducibility of the outputs generated by the GPTs with those produced using standard prompts.  
136 Detailed results for each evaluation category are provided below.

137

## 138 **Evaluation of accuracy and reproducibility**

### 139 **Accuracy evaluation of research objectives and background**

140 The GPT-4o model produced outputs that completely matched the content of the research protocol in  
141 eight out of ten attempts, whereas the GPT-4 model achieved seven complete matches. In both models,  
142 discrepancies were found where “trastuzumab BS” was mistakenly shortened to “trastuzumab.”  
143 Specifically, the research protocol states, “In this context, we decided to provide trastuzumab BS, one  
144 of the matched treatments, to patients with solid tumors who tested positive for HER2 gene  
145 amplification through the above cancer genome profiling test system, and to explore its efficacy.”  
146 However, the output omitted “BS” from “trastuzumab BS” and only referred to “trastuzumab” (Table  
147 1).

148

149 **Table 1. Comparison of Accuracy Between GPT-4o and GPT-4 Models in Reviewing Research Protocols**

| Item                               | Consistency Rate (%) |       | Partial Consistency Rate (%) |       |
|------------------------------------|----------------------|-------|------------------------------|-------|
|                                    | GPT-4o               | GPT-4 | GPT-4o                       | GPT-4 |
| Research objectives and background | 80                   | 70    | 20                           | 30    |



|                                    |     |     |   |   |
|------------------------------------|-----|-----|---|---|
| Research design                    | 100 | 100 | 0 | 0 |
| Advantages and disadvantages (RP)  | 100 | 100 | 0 | 0 |
| Advantages and disadvantages (ICF) | 100 | 100 | 0 | 0 |

150 • **RP** Research protocol

151 • **ICF:** Informed consent form

152 • **Accuracy evaluation:** The consistency rate represents the percentage of outputs that perfectly matched the research  
153 protocol, while the partial consistency rate indicates cases where the main information was mostly consistent. (Based  
154 on the results of 10 trials)

155

### 156 **Accuracy evaluation of research design**

157 Regarding research design, both GPT-4o and GPT-4 produced outputs that were completely consistent  
158 with the content of the research protocol in all 10 attempts. Specifically, all outputs correctly included  
159 information such as “Open-label, single-arm, multicenter interventional study, target: patients with  
160 advanced solid tumors without standard treatment options, non-randomized, sample size: 41.”  
161 Additionally, some outputs accurately included supplementary information, such as study duration,  
162 interim analysis, primary endpoints, and administration methods (Table 1).

163

### 164 **Accuracy evaluation of advantages and disadvantages**

165 Regarding the advantages and disadvantages outlined in the research protocol and ICF, both GPT-4o

166 and GPT-4 produced outputs that were completely consistent with the content of the research protocol  
167 in all 10 attempts (Table 1).

168

169 Fig. 1 provides a visual representation of the differences in the consistency rates for each evaluation category, with  
170 the GPT-4o model showing higher overall consistency rates.

171

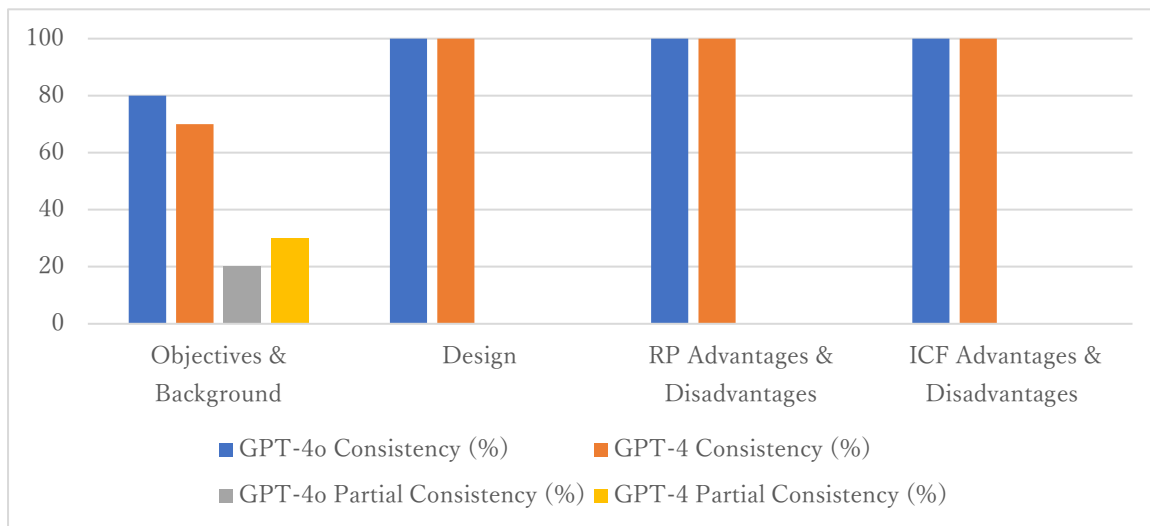

172

173 **Fig. 1. Comparison of consistency and partial consistency rates for research protocol review**

174

## 175 **Reproducibility evaluation**

176 For reproducibility, both the GPT-4o and GPT-4 models demonstrated high reproducibility in the  
177 categories of "Research objectives and background," "Research design," and "advantages and  
178 disadvantages." Specifically, reproducibility was considered "high" if 8 or more out of 10 trials were  
179 rated as "consistent" or "partially consistent" (Table 2).

180

181 **Table 2. Comparison of Reproducibility in Reviewing Research Protocols Between GPT-4o and GPT-4 Models**

| Item                                              | GPT-4o | GPT-4 |
|---------------------------------------------------|--------|-------|
| Research objectives and background                | High   | High  |
| Research Design                                   | High   | High  |
| Advantages and disadvantages of research protocol | High   | High  |
| Advantages and disadvantages of ICF               | High   | High  |

182 • **Reproducibility evaluation:** Reproducibility was assessed based on the number of trials in which the output was  
183 judged to be consistent or partially consistent. Reproducibility was rated as “high” if 8 or more out of 10 attempts  
184 were consistent or partially consistent, “moderate” if 5-7 attempts were consistent or partially consistent, and “low”  
185 if 4 or fewer attempts were consistent or partially consistent.

186

### 187 **Comparison of GPTs and standard ChatGPT prompt outputs**

188 In addition to the outputs generated using the GPTs, we produced outputs using standard prompts to  
189 assess the advantages described in the research protocol. The results of GPT-4o showed that GPTs  
190 consistently generated two advantages across all 10 trials: (1) improvement in detailed information  
191 collection and follow-up care, and (2) an increase in treatment options.

192

193 In contrast, outputs generated using standard prompts produced a more diverse range of categories,  
194 with the number of advantages mentioned varying between 3 and 8 across the 10 trials (Tables 3 and

195 4). The categories of advantages produced by the GPTs and standard prompts are summarized in Table

196 4.

197

198 **Table 3. Number of benefits generated by GPTs and standard prompts (Model used: GPT-4o)**

| Prompt Type      | Number of Trials | Avg. Benefits | SD  | Max | Min |
|------------------|------------------|---------------|-----|-----|-----|
| GPTs             | 10 trials        | 2             | 0   | 2   | 2   |
| Standard prompts | 10 trials        | 5.3           | 1.8 | 8   | 3   |

199 • **Avg. Benefits:** Average number of benefits

200

201 **Table 4. Benefit categories generated by GPTs and standard prompts (Model used: GPT-4o)**

| Category Name                                      | GPTs | Standard Prompts |
|----------------------------------------------------|------|------------------|
| Detailed information collection and follow-up care | Yes  | Yes              |
| Increase in treatment options                      | Yes  | Yes              |
| Reduction of economic burden                       | N/A  | Yes              |
| Compensation for health risks                      | N/A  | Yes              |
| Provision of personalized treatment                | N/A  | Yes              |
| Cost-effective treatment                           | N/A  | Yes              |
| Evaluation of treatment efficacy and safety        | N/A  | Yes              |
| Collection and analysis of clinical data           | N/A  | Yes              |

|                                    |     |     |
|------------------------------------|-----|-----|
| Protection of personal information | N/A | Yes |
| Improvement in quality of life     | N/A | Yes |

202

## 203 Discussion

204 This study served as a preliminary evaluation of the accuracy and reproducibility of ChatGPT when  
205 reviewing Japanese research protocols using Japanese prompts. The results demonstrated different  
206 levels of accuracy and reproducibility between the GPT-4 and GPT-4o models in the review process.  
207 These findings provide essential baseline data for the future implementation of RAG techniques and  
208 fine-tuning.

209

210 First, the GPT-4o model achieved an 80% consistency rate for "Research Objectives and Background"  
211 and a 100% consistency rate for "Research Design." This suggests that the GPT-4o model could be  
212 valuable in ensuring consistency in the review process, indicating the potential for AI to efficiently and  
213 accurately analyze Japanese research protocols. Although GPT-4 showed slightly lower consistency  
214 rates, it maintained high accuracy, demonstrating performance levels that may be applicable in review  
215 tasks. These results underscore the importance of continuing comparative assessments between the  
216 GPT-4 and GPT-4o models. Evaluating the nuanced differences between the two models across  
217 different tasks and conditions will help deepen our understanding of their respective characteristics.

218

219 Previous studies have also highlighted the ongoing challenges of reproducibility and accuracy in AI  
220 applications within the medical field. For example, “The reproducibility issues that haunt health-care  
221 AI” points out that AI faces reproducibility issues in medical diagnoses and treatments attributed to  
222 inconsistent results across different datasets and conditions [26]. The findings of this study reaffirm  
223 the importance of reproducibility as a critical factor in the practical application of AI technologies,  
224 aligning with previous research. In particular, the evaluation of AI’s accuracy and reproducibility in  
225 analyzing medical documents remains a significant challenge for future technological development.

226

227 This will not only broaden the application scope of AI but also provide foundational data for optimal  
228 model selection. By assessing the flexibility and adaptability in handling complex medical documents,  
229 the groundwork for the practical application of AI tools can be established. Thus, the ongoing  
230 comparison between GPT-4 and GPT-4o is a critical step in maximizing AI performance and selecting  
231 the most effective tool for real-world applications.

232

233 Moreover, a comparison between the outputs generated using GPTs and those generated using standard  
234 prompts showed that the GPTs consistently exhibited high reproducibility, thereby improving the  
235 accuracy of the review process. In contrast, the outputs generated using standard prompts displayed  
236 variability in the extracted information, which was attributed to a lack of detailed prompt settings.  
237 These findings suggest that incorporating RAG techniques and fine-tuning can further enhance the

238 precision and consistency of AI-assisted reviews.

239 Technical challenges related to reading PDFs were also identified. In particular, when PDF files are  
240 highly structured or text is stored as images, ChatGPT cannot extract information accurately. It was  
241 confirmed that converting documents to Word format and standardizing the formatting of sections  
242 improved the reading and analysis accuracy. This indicates that document structure and format  
243 standardization are crucial factors for improving the accuracy of AI-assisted reviews, emphasizing the  
244 importance of proper document preparation for effective AI utilization. These findings provide  
245 practical guidelines for preventing incorrect information extraction.

246

247 Additionally, although ChatGPT demonstrated the potential to process specialized documents, such as  
248 research protocols, with a certain degree of accuracy and reproducibility in the medical field, its  
249 performance was found to be dependent on the document format and structure. For instance,  
250 distinguishing between similar technical terms, such as "trastuzumab BS" and "trastuzumab," proved  
251 challenging, indicating the need for further improvements. Maintaining consistency in terminology by  
252 using guidelines and templates when drafting documents is crucial. This will help further enhance the  
253 accuracy and reliability of AI-assisted reviews.

254

255 Future research should explore the optimal approach by combining RAG techniques and fine-tuning  
256 to improve the precision of handling technical terms. Additionally, we plan to investigate best practices

257 for document preparation to maximize AI performance. Ultimately, ChatGPT has the potential to  
258 contribute to the efficiency and accuracy of IRB review processes; however, further research and  
259 validation are required. This study lays a crucial foundation for improving review tasks using AI, and  
260 provides directions for future research and development.

261

## 262 **Limitations**

263 This study had two main limitations. First, because the appropriateness of the published review results  
264 was not disclosed, it was not possible to directly verify the accuracy of ChatGPT's evaluations against  
265 a reference set of correct answers. We recognize that this constraint imposes certain limitations on the  
266 accuracy and reproducibility assessments in this study. Therefore, the research team manually  
267 reviewed the research protocols and output results, evaluating accuracy and reproducibility based on  
268 predefined criteria (Tables 5–7). However, since the manual review process contains subjective  
269 elements, there is a potential for bias in the evaluation of the results.

270

271 **Table 5. Four custom GPTs created for this study**

| Type  | Overview of Prompts                                                                                                                         |
|-------|---------------------------------------------------------------------------------------------------------------------------------------------|
| GPTs1 | Accurately extract the research objectives and background from the provided research protocol.                                              |
| GPTs2 | Accurately extract details such as target patients, trial phase, trial type, randomization, control group setup, blinding, and sample size. |



|       |                                                                                                                                |
|-------|--------------------------------------------------------------------------------------------------------------------------------|
| GPTs3 | Accurately extract the advantages and disadvantages for the subjects from sections 16.3.1 and 16.3.2 of the research protocol. |
| GPTs4 | Accurately extract the advantages and disadvantages for the subjects from Section 6 of the ICF.                                |

272

273 **Table 6. Criteria for consistency evaluation**

| Item                      | Condition                                                                                                                                                                                                                                                                       |
|---------------------------|---------------------------------------------------------------------------------------------------------------------------------------------------------------------------------------------------------------------------------------------------------------------------------|
| Accuracy of content       | <ul style="list-style-type: none"> <li>• Specific numerical values match perfectly.</li> <li>• All major information related to research objectives and background is included.</li> <li>• All major information related to research design and methods is included.</li> </ul> |
| Consistency of meaning    | The meaning and intent of the original document are accurately conveyed.                                                                                                                                                                                                        |
| Consistency of expression | Even if phrasing or word choices differ, the meaning and intent remain unchanged.                                                                                                                                                                                               |

274

275 **Table 7. Criteria for accuracy evaluation**

| Evaluation criteria  | Description                                                                                                                                                                                                                                                       |
|----------------------|-------------------------------------------------------------------------------------------------------------------------------------------------------------------------------------------------------------------------------------------------------------------|
| Consistent           | The output content matches the content of the research protocol completely and without error.                                                                                                                                                                     |
| Partially consistent | The major information and intent of the output are mostly consistent with the research protocol, but minor discrepancies are observed. However, these discrepancies do not significantly impair the accuracy of the information, nor do they alter the meaning or |

|              |                                                                                                                                                                               |
|--------------|-------------------------------------------------------------------------------------------------------------------------------------------------------------------------------|
|              | intent.                                                                                                                                                                       |
| Inconsistent | The output content does not match the major content of the research protocol, resulting in significant impairment of information accuracy or alteration of meaning or intent. |

276

277 Second, since this study did not use an Application Programming Interface (API), the system did not  
278 automatically log which model (GPT-4 or GPT-4o) was used in each session. Consequently, it was not  
279 possible to systematically verify the model used from the downloaded data. However, because the  
280 researchers manually recorded the model used for each session, we believe this limitation did not  
281 significantly affect the overall reliability of the study. In future research, we plan to use the API to  
282 automate detailed logging to ensure greater objectivity and reproducibility. The use of the API is  
283 expected to further improve the efficiency and accuracy of the research.

284

## 285 **Materials and Methods**

### 286 **Study overview**

287 In this study, we evaluated the performance of GPT models (OpenAI, Inc., San Francisco, CA, USA)  
288 by reviewing research protocols. Specifically, we compared the latest GPT-4o model with the  
289 traditional GPT-4 model to assess the improvements in accuracy when processing Japanese documents  
290 with Japanese prompts. GPTs (Generative Pre-trained Transformers) are specialized versions of  
291 ChatGPTs that users can customize for specific tasks or topics designed to handle complex processes.

292

293 We evaluated the accuracy and reproducibility of both the GPT-4 and GPT-4o models using customized  
294 GPTs for the following evaluation categories: 1) research objectives and background, 2) research  
295 design, and 3) advantages and disadvantages of the research. Furthermore, after comparing the GPT-4  
296 and GPT-4o models, we used the GPT-4o model to compare the outputs generated by the GPTs with  
297 those generated using standard prompts. For standard prompts, we used only the GPT-4o model to  
298 extract the advantages and compared the results with those of GPTs. This comparison allowed us to  
299 analyze the differences in reproducibility and accuracy between the models and methods.

300

## 301 **Data source**

302 The research protocols used in this study were mock review materials published on the official website  
303 of Japan's Ministry of Health, Labor, and Welfare [27-31]. These materials included 10 research  
304 projects from various disease areas: three in oncology, one in gastrointestinal diseases, one in  
305 rheumatoid arthritis, one in vaccines, one in medical devices, one in cardiovascular diseases, one in  
306 pediatric psychiatric disorders, and one in cognitive impairment. Each project included implementation  
307 plans, research protocols, explanatory clinical research documents, lists of collaborating investigators,  
308 procedure manuals for disease response, monitoring manuals, audit manuals, and expert evaluations.

309

310 For this study, we used the research protocol titled "Phase II Trial of Trastuzumab for Patients with

311 Advanced Solid Tumors without Standard Treatment Options Showing HER2 Gene Amplification"  
312 (【統合版】模擬審査①(HER2)\_研究計画書.pdf). Initially, uploading the research protocol PDF  
313 directly to ChatGPT proved difficult for reading, analyzing, and extracting text due to inconsistencies  
314 in the PDF structure and quality. This issue was particularly pronounced when the text was stored as  
315 images or when the PDF creation process was not standardized. To address this, we converted the PDF  
316 into Word format using a general PDF-to-Word conversion tool and standardized the document  
317 formatting. This conversion significantly improved ChatGPT's ability to accurately analyze the  
318 research protocol. An expert evaluation document was used as reference to determine the four  
319 evaluation categories for the research protocol.

320

## 321 **GPT model selection**

322 In this study, we evaluated the performance of the GPT-4 and GPT-4o models. GPT-4 is a well-  
323 established high-performance model, rated highly in many text-generation tasks [32]. In contrast, GPT-  
324 4o, updated on May 13, 2024, is twice as fast as GPT-4 Turbo, while reducing costs by 50%. Thus,  
325 GPT-4o offers significant advantages in terms of cost efficiency and processing speed. Furthermore,  
326 GPT-4o sets new standards for speech recognition, multilingual support, and visual capabilities,  
327 achieving high accuracy in non-English languages due to improvements in multilingual capabilities  
328 [33]. Given these characteristics, we deemed it important to verify the potential accuracy  
329 improvements in the GPT-4o model.

330

## 331 **GPTs customization and use**

332 In this study, we utilized the "GPTs" feature provided by OpenAI to create four customized GPTs [34]  
333 aimed at evaluating research protocols and informed consent forms (ICFs) (Table 5). Each GPT was  
334 designed to correspond to a specific evaluation category and serve the following purposes and roles:

335 • **GPTs1:** A prompt designed to extract and summarize the "Research Objectives and Background"  
336 from the research protocol. The prompt was instructed to accurately extract important terms and  
337 abbreviations.

338 • **GPTs2:** A prompt designed to extract and summarize the "Research Design and Methods" from the  
339 research protocol, accurately capturing key information such as the trial phase and target patients.

340 • **GPTs3:** A prompt designed to extract the advantages and disadvantages for participants from the  
341 research protocol.

342 • **GPTs4:** A prompt designed to extract the advantages and disadvantages for participants from the  
343 ICF.

344

345 To evaluate the advantages and disadvantages, each GPT was designed to focus on specific sections  
346 where these were described in the research protocol and ICF and to accurately extract the relevant  
347 content. Using these GPTs, we compared the performance of GPT-4 and GPT-4o.

348

349 These models were developed using cutting-edge natural language processing (NLP) technology.  
350 GPTs are pretrained on vast amounts of text data and can adapt to tasks such as new text generation,  
351 question answering, and summarization. This enables GPTs to generate highly accurate human-like  
352 texts.

353  
354 GPTs are superior to regular chat sessions in the following ways [34]:

- 355 1. **Pre-training on vast data:** They possess a wide range of knowledge and contextual understanding.
- 356 2. **Transformer architecture:** They generate high-precision, consistent responses by considering  
357 long-range dependencies.
- 358 3. **Adaptability to various tasks:** They are capable of text generation, summarization, translation,  
359 and answering questions.

360  
361 We used pretrained GPT models without fine-tuning and set detailed conditions to achieve consistent  
362 processing. All prompts and review materials were created and processed in Japanese, considering the  
363 improved multilingual capabilities of the GPT-4o model and the fact that the research protocols were  
364 written in Japanese.

## 365 366 **GPTs evaluation process**

367 In this study, the following procedure was adopted to confirm the reproducibility of the ChatGPT

368 models:

369

370 1. Start a new chat session.

371 2. Select the model: Either GPT-4 or GPT-4o.

372 3. Select one of the four custom GPTs (GPTs1, GPTs2, GPTs3, GPTs4).

373 4. Upload the document for evaluation: Upload the research protocol or ICF to the selected custom

374 GPT.

375 5. Output the results: Once the document is processed and results are output, initiate a new chat

376 session. This ensures that each session is independent and free from the influence of previous

377 sessions.

378 6. Repeat the process: Follow the steps as outlined below:

379 • **GPTs1:** Conduct 10 runs with GPT-4, followed by 10 runs with GPT-4o.

380 • **GPTs2:** Conduct 10 runs with GPT-4, followed by 10 runs with GPT-4o.

381 • **GPTs3:** Conduct 10 runs with GPT-4, followed by 10 runs with GPT-4o.

382 • **GPTs4:** Conduct 10 runs with GPT-4, followed by 10 runs with GPT-4o.

383

384 This process resulted in 80 evaluations across both the GPT-4 and GPT-4o models for each custom

385 GPT. As a result of the above process, the values shown in Table 1 represent the agreement and partial

386 agreement rates based on the results of 10 trials for each model. Specifically, using the four custom

387 GPTs listed in Table 2, we evaluated each model's performance in extracting and summarizing the  
388 research objectives and background, research design and methods, and advantages and disadvantages.  
389 Following this, we used only the GPT-4o model to compare the results of the GPTs with the output of  
390 the standard prompts, focusing on the extraction of advantages and analyzing the performance  
391 differences between the models and methods.

392

### 393 **Standard prompt usage**

394 Additionally, we conducted tasks to extract advantages from the research protocol using a regular  
395 ChatGPT interface without GPTs. In this approach, we instructed ChatGPT: "You are an IRB reviewer.  
396 Please extract the advantages for the participants from the uploaded research protocol and list them as  
397 bullet points." This mimicked a typical review process without specifying particular sections or  
398 information. The prompts were created entirely in Japanese and the review materials were also  
399 processed in Japanese.

400

401 Unlike GPTs, this method did not specify detailed settings or sections and was used to evaluate the  
402 diversity and variability of the output results. We used only the GPT-4o model for standard prompts,  
403 focusing on extracting the advantages for comparison with GPTs. This allowed us to assess the extent  
404 to which differences in accuracy and reproducibility arose between the use of the GPTs and standard  
405 prompts.



406

## 407 **Standard prompt evaluation process**

408 To confirm the reproducibility of the GPTs and standard prompts, the following procedure was adopted

409

410 1. Start a new chat session.

411 2. Select the GPT-4o model.

412 3. Enter the prompt into the input field.

413 4. Upload the document for evaluation: Upload the research protocol for evaluation.

414 5. Output Results: Once the document is processed and the results are output, start a new chat session.

415 This ensures that each session is independent and free from the influence of previous sessions.

416 6. Repeat the process: Repeat the above steps 10 times.

417

418 Supplementary file 1 includes key sections of the research protocol translated from Japanese

419 to English, as well as a list of the prompts created in Japanese and their corresponding output

420 results, also translated from Japanese to English.

421

## 422 **Confirmation of accuracy and reproducibility**

423 For the two categories, "Research Objectives and Background" and "Research Design and Methods,"

424 we confirmed whether the 10 outputs from each model were consistent with the content of the research

425 protocol, evaluating both accuracy and reproducibility. The evaluation criteria were as follows:

426

427 First, we established consistency criteria, as shown in Table 6, and used them to assess whether  
428 ChatGPT's output matched the content of the research protocol. These criteria included content  
429 accuracy, meaning consistency, and expression consistency. For content accuracy, we confirmed  
430 whether the specific numbers and data were completely accurate, whether all key information related  
431 to the research objectives and background was included, and whether all key information related to the  
432 research design and methods was present. For meaning consistency, we ensured that the original  
433 document's intent was accurately conveyed. For expression consistency, we confirmed that even if the  
434 phrasing or word choice differed, the meaning and intent remained the same. For example, phrases  
435 like "the number of patients increased" and "patient numbers increased," or "the effectiveness of the  
436 treatment was confirmed" and "treatment effectiveness was confirmed" would be considered  
437 synonymous.

438

439 Based on the consistency criterion, we classified each trial output as "consistent," "partially  
440 consistent," or "inconsistent" using the accuracy evaluation criteria in Table 7. "Consistent" was  
441 defined as output content being completely in line with the main content of the research protocol.  
442 "Partially consistent" referred to cases where there were minor inconsistencies, but the main  
443 information or intent was mostly aligned. "Inconsistent" was when the major content did not match,

444 compromising the accuracy of the information.

445

446 Subsequently, reproducibility was evaluated based on the results of 10 trials. According to the  
447 reproducibility evaluation criteria in Table 8, if 8 or more of the 10 trials were deemed "consistent" or  
448 "partially consistent," reproducibility was rated as "high." If 5-7 trials were deemed "consistent" or  
449 "partially consistent," reproducibility was rated as "moderate." If 4 or fewer trials met the criteria,  
450 reproducibility was rated as "low."

451

452 Through this evaluation process, the accuracy and reproducibility of ChatGPT's output were  
453 thoroughly assessed.

454

455 **Table 8. Criteria for reproducibility evaluation**

| Reproducibility level | Description                                                                                                                 |
|-----------------------|-----------------------------------------------------------------------------------------------------------------------------|
| High                  | When 8 or more out of 10 trials are judged as "consistent" (including "consistent" and "partially consistent" in Table 7).  |
| Moderate              | When 5 to 7 out of 10 trials are judged as "consistent" (including "consistent" and "partially consistent" in Table 7).     |
| Low                   | When 4 or fewer out of 10 trials are judged as "consistent" (including "consistent" and "partially consistent" in Table 7). |

456

## 457 **Accuracy and reproducibility of advantages and disadvantages**

458 Next, we used ChatGPT to extract the advantages and disadvantages from the "Benefits and Risks"  
459 section of the research protocol and evaluated their accuracy and reproducibility. The evaluation  
460 criteria were as follows

461

462 The advantages and disadvantages of the research protocol are listed in Table 9, whereas those of the  
463 ICF are listed in Table 10. We evaluated whether the content extracted by ChatGPT matched these  
464 entries based on the "Consistency" criteria described in Table 6.

465

466 **Table 9. Advantages and disadvantages listed in the research protocol**

| <b>Item</b>    | <b>Description</b>                                                                                                                                                           |
|----------------|------------------------------------------------------------------------------------------------------------------------------------------------------------------------------|
| Advantage 1    | In addition to regular treatment, more detailed information collection and follow-up care can be conducted, leading to more appropriate and thorough treatment.              |
| Advantage 2    | The investigational drug, by recognizing HER2 gene amplification, may reveal its impact on the treatment of advanced solid tumors, potentially increasing treatment options. |
| Disadvantage 1 | A larger amount of blood collection than usual is expected.                                                                                                                  |
| Disadvantage 2 | Administration of the investigational drug may cause side effects.                                                                                                           |

467

468 **Table 10. Advantages and disadvantages listed in the ICF**

| Item           | Description                                                                                                                                                                 |
|----------------|-----------------------------------------------------------------------------------------------------------------------------------------------------------------------------|
| Advantage 1    | If the investigational drug Trastuzumab Biosimilar X proves effective, there is a possibility that the progression of cancer may temporarily halt, or symptoms may improve. |
| Advantage 2    | In the future, if Trastuzumab Biosimilar X proves effective in recognizing HER2 gene amplification in solid tumors, it may increase treatment options.                      |
| Disadvantage 1 | A larger amount of blood collection than usual is expected.                                                                                                                 |
| Disadvantage 2 | There is a possibility of side effects from the administration of Trastuzumab Biosimilar X.                                                                                 |
| Disadvantage 3 | Compared to regular treatment, there may be an increase in hospital visits, the duration of hospital stays, and the number of tests conducted.                              |

469

470 Additionally, we performed the same task of extracting the advantages and disadvantages from the  
471 research protocol using a standard ChatGPT session without using GPTs. In the standard ChatGPT  
472 session, the user simply instructed, "As an IRB reviewer, please extract the advantages for participants  
473 from the attached research protocol and output them as bullet points," without setting any detailed  
474 task-specific configurations.

475

476 This comparison allowed us to assess the differences in the information extracted when using GPTs  
477 versus when not using them, thereby evaluating the utility of GPTs in complementing the IRB review

478 process.

479

## 480 **Acknowledgments**

481 We would like to express our gratitude to Associate Professor Kenji Hirata from the Department of  
482 Diagnostic Imaging, Graduate School of Medicine, Hokkaido University, for providing valuable  
483 insights related to this project. We also thank Professor Shiro Hinotsu from the Division of  
484 Biostatistics and Data Management, Sapporo Medical University, for dedicating his time to discuss  
485 this topic with us. Finally, we would like to thank Editage ([www.editage.jp](http://www.editage.jp)) for English language  
486 editing.

487

## 488 **References**

489 1. 厚生労働省, 第2回 厚生科学審議会 臨床研究部会 議事録

490 [cited 2024 Sep 13]. Available from: <https://www.mhlw.go.jp/stf/shingi2/0000179030.html>

491

492 2. 厚生労働省, 第10回厚生科学審議会臨床研究部会 議事録

493 [cited 2024 Sep 13]. Available from: [https://www.mhlw.go.jp/stf/newpage\\_03963.html](https://www.mhlw.go.jp/stf/newpage_03963.html)

494

495 3. 厚生労働省, 第10回厚生科学審議会臨床研究部会資料1：臨床研究・治験の推進に係る論点整理

496 [cited 2024 Sep 13]. Available from: [https://www.mhlw.go.jp/stf/newpage\\_03565.html](https://www.mhlw.go.jp/stf/newpage_03565.html)

497

498 4. 厚生労働省, 第 34 回厚生科学審議会臨床研究部会 議事録[cited 2024 Sep 13]. Available from:

499 [https://www.mhlw.go.jp/stf/newpage\\_38195.html](https://www.mhlw.go.jp/stf/newpage_38195.html)

500

501 5. 厚生労働省, 第 34 回厚生科学審議会臨床研究部会 資料 1 : 認定臨床研究審査委員会について

502 [cited 2024 Sep 13]. Available from: [https://www.mhlw.go.jp/stf/newpage\\_37286.html](https://www.mhlw.go.jp/stf/newpage_37286.html)

503

504 6. 厚生労働省, 第 35 回厚生科学審議会臨床研究部会 議事録

505 [cited 2024 Sep 13]. Available from: [https://www.mhlw.go.jp/stf/newpage\\_43555.html](https://www.mhlw.go.jp/stf/newpage_43555.html)

506

507 7. 厚生労働省, 第 35 回厚生科学審議会臨床研究部会 資料 1 - 6 : 認定臨床研究審査委員会について

508 [cited 2024 Sep 13]. Available from: [https://www.mhlw.go.jp/stf/newpage\\_42147.html](https://www.mhlw.go.jp/stf/newpage_42147.html)

509

510 8. Larson E, Bratts T, Zwanziger J, Stone P. A Survey of IRB process in 68 U.S. hospitals. J Nurs Scholarsh.

511 2004;36:260-264. doi: 10.1111/j.1547-5069.2004.04047.x.

512

513 9. Dyrbye LN, Thomas MR, Mechaber AJ, Eacker A, Harper W, Massie FS Jr, et al. Medical education research

514 and IRB review: An analysis and comparison of the IRB review process at six institutions. Acad Med.

515 2007;82:654-660. doi: 10.1097/ACM.0b013e31806747b8.

516

517 10. Abbott L, Grady C. A Systematic Review of the Empirical Literature Evaluating IRBs: What we know and what  
518 we still need to learn. *J Empir Res Hum Res Ethics*. 2011;6:3-19. doi: <https://doi.org/10.1525/jer.2011.6.1.3>

519

520 11. Haug CJ, Drazen JM. Artificial intelligence and machine learning in clinical medicine, 2023. *N Engl J Med*.  
521 2023;388:1201–1208. doi: 10.1056/NEJMp2301212.

522

523 12. Nazario-Johnson L, Zaki HA, Tung GA. Use of large language models to predict neuroimaging. *J Am Coll*  
524 *Radiol*. 2023;20:1004-1009. doi: 10.1016/j.jacr.2023.06.008.

525

526 13. Lee KH, Lee RW, Kwon YE. Validation of a deep learning chest X-ray interpretation model: integrating large-  
527 scale AI and large language models for comparative analysis with ChatGPT. *Diagnostics (Basel)*. 2023;14:90.  
528 doi: 10.3390/diagnostics14010090.

529

530 14. Denecke K, May R, Rivera Romero O, LLM Health Group. Potential of large language models in health care:  
531 Delphi Study. *J Med Internet Res*. 2024;26:e52399. doi: 10.2196/52399.

532

533 15. Hirosawa T, Harada Y, Tokumasu K, Ito T, Suzuki T, Shimizu T. Evaluating ChatGPT-4's diagnostic accuracy:  
534 Impact of visual data integration. *JMIR Med Inform*. 2024;12:e55627. doi: 10.2196/55627.



535

536 16. Zhu Q, Chen X, Jin Q, Hou B, Mathai TS, Mukherjee P, et al. Leveraging professional radiologists' expertise to  
537 enhance LLMs' evaluation for radiology reports. ArXiv [Preprint]. 2024:arXiv:2401.16578v3. doi:  
538 10.48550/arXiv.2401.16578.

539 17. Al Nazi Z, Peng W. Large language models in healthcare and medical domain: A review. Comput Lang. 2024.  
540 [doi: 10.48550/arXiv.2401.06775](https://doi.org/10.48550/arXiv.2401.06775).

541

542 18. Naveed H, Khan AU, Mian A, Saqib M, Anwar S, Usman M, et al. A comprehensive overview of large language  
543 models. arXiv. 2023. doi: 10.48550/arXiv.2307.06435.

544 19. OpenAI. Introducing ChatGPT [cited 2024 Sep 13]. Available from: <https://openai.com/blog/chatgpt>.

545

546 20. Gilson A, Safranek CW, Huang T, Socrates V, Chi L, Taylor RA, et al. How does ChatGPT perform on the  
547 United States Medical Licensing Examination (USMLE)? The implications of large language models for  
548 medical education and knowledge assessment. JMIR Med Educ. 2023;9:e45312. doi: 10.2196/45312. Erratum  
549 in: JMIR Med Educ. 2024;10:e57594. doi: 10.2196/57594.

550 21. Yanagita Y, Yokokawa D, Uchida S, Tawara J, Ikusaka M. Accuracy of ChatGPT on medical questions in the  
551 national medical licensing examination in Japan: Evaluation Study. JMIR Form Res. 2023;7:e48023. doi:  
552 10.2196/48023.

553

- 554 22. Tanaka Y, Nakata T, Aiga K, Etani T, Muramatsu R, Katagiri S, et al. Performance of generative pretrained  
555 transformer on the national medical licensing examination in Japan. PLOS Digit Health. 2024;3:e0000433. doi:  
556 10.1371/journal.pdig.0000433.
- 557
- 558 23. 厚生労働省, 第2回 厚生科学審議会 臨床研究部会 資料3 認定臨床研究審査委員会について  
559 [cited 2024 Sep 13]. Available from: <https://www.mhlw.go.jp/stf/shingi2/0000175731.html>
- 560
- 561 24. 厚生労働省, 第5回 厚生科学審議会 臨床研究部会 議事録  
562 [cited 2024 Sep 13]. Available from: <https://www.mhlw.go.jp/stf/shingi2/0000188562.html>
- 563
- 564 25. 厚生労働省, 第5回 厚生科学審議会 臨床研究部会 資料2 認定臨床研究審査委員会について  
565 [cited 2024 Sep 13]. Available from: <https://www.mhlw.go.jp/stf/shingi2/0000184433.html>
- 566
- 567 26. Sohn E. The reproducibility issues that haunt health-care AI. Nature. 2023;613:402-403. doi:  
568 10.1038/d41586-023-00023-2.
- 569 27. 厚生労働省, 第8回厚生科学審議会臨床研究部会 議事録  
570 [cited 2024 Sep 13]. Available from: [https://www.mhlw.go.jp/stf/newpage\\_02822.html](https://www.mhlw.go.jp/stf/newpage_02822.html)
- 571
- 572 28. 厚生労働省, 第8回厚生科学審議会臨床研究部会 参考資料3 : 臨床研究法の施行状況等について

573 [cited 2024 Sep 13]. Available from: [https://www.mhlw.go.jp/stf/newpage\\_02524.html](https://www.mhlw.go.jp/stf/newpage_02524.html)

574

575 29. 厚生労働省, 第9回厚生科学審議会臨床研究部会 議事録

576 [cited 2024 Sep 13]. Available from: [https://www.mhlw.go.jp/stf/newpage\\_03737.html](https://www.mhlw.go.jp/stf/newpage_03737.html)

577

578 30. 厚生労働省, 第9回厚生科学審議会臨床研究部会 資料3: 臨床研究・治験活性化等に関する取組

579 等について

580 [cited 2024 Sep 13]. Available from: [https://www.mhlw.go.jp/stf/newpage\\_03163.html](https://www.mhlw.go.jp/stf/newpage_03163.html)

581

582 31. 模擬審査資料 模擬審査における認定委員会の審査資料一式について (平成31年3月28日厚生労働省

583 威勢曲研究開発振興課事務連絡) 令和元年模擬審査資料 (課題1~5), 令和元年模擬審査資料

584 (課題6~10) [cited 2024 Apr 9]. Available from:

585 <https://www.mhlw.go.jp/stf/seisakunitsuite/bunya/0000163417.html>

586

587 32. OpenAI. GPT-4 is OpenAI's most advanced system, producing safer and more useful responses

588 [cited 2024 Sep 13]. Available from: <https://openai.com/product/gpt-4>.

589

590 33. OpenAI. Hello GPT-4o [cited 2024 Sep 13]. Available from: <https://openai.com/index/hello-gpt-4o/>

591 34. OpenAI. Introducing GPTs [cited 2024 Sep 13]. Available from: <https://openai.com/index/introducing-gpts/>
